# Supplementary material for: Experimental timing of pyrite oxidation under various leaching conditions: consequences for rates of weathering in geological profiles
Source: Springer Nature journal article supplement (doi:10.1007/s12665-023-11325-z), 2023-12-16
Supplement: MOESM1 [file 26537364]

## Experimental timing of pyrite oxidation under various leaching conditions: consequences for rates of weathering in geological profiles

*Environmental Earth Sciences*

POOT Julien<sup>1\*</sup>, FELTEN Alexandre<sup>2</sup>, COLAUX Julien L.<sup>2</sup>, GOUTTEBARON Rachel<sup>2</sup>, LEPÊCHEUR Guillaume<sup>1,3</sup>, ROCHEZ Gaëtan<sup>1</sup> & YANS Johan<sup>1</sup>

1. Department of Geology, Institute of Life-Earth-Environment (ILEE), University of Namur, Rue de Bruxelles 61, 5000 Namur, Belgium
2. Department of Physics, Namur Institute of Structured Matter (NISM), Synthesis, Irradiation and Analysis of Materials (SIAM), University of Namur, Rue de Bruxelles 61, 5000 Namur, Belgium
3. KU Leuven, Department Earth and Environmental Sciences, Division of Geology, Celestijnenlaan 200E, B-3001 Leuven, Belgium.

\*Corresponding author: julien.poot@unamur.be, ORCID 0000-0003-2267-0112

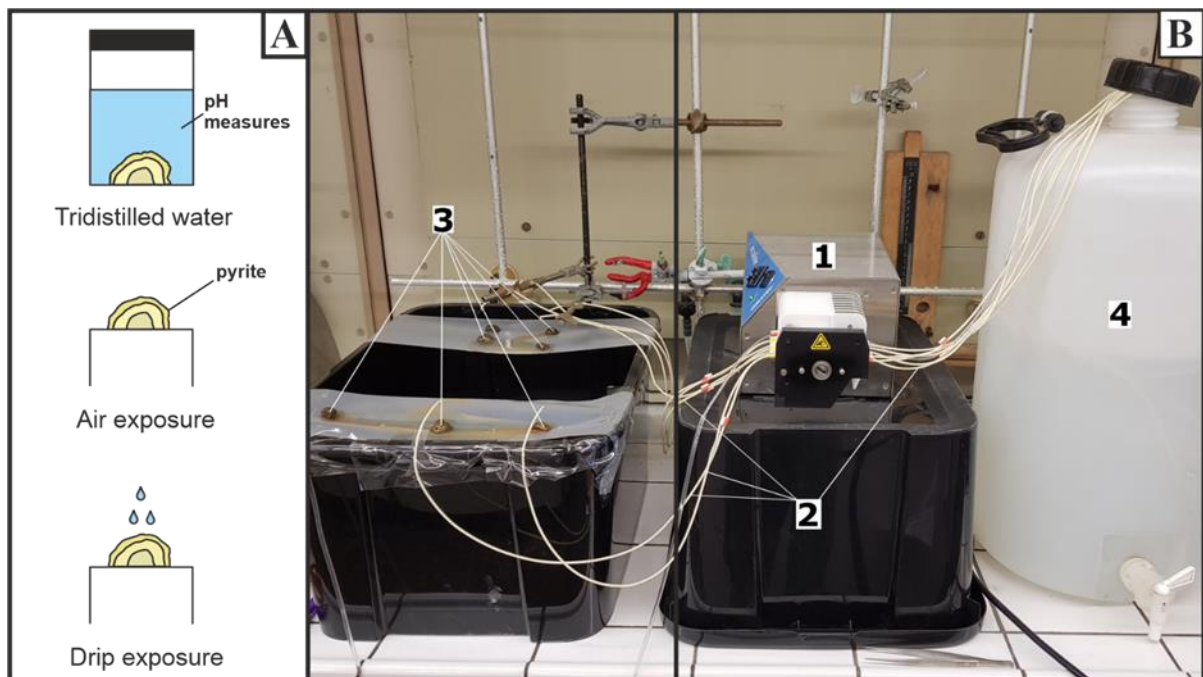

**ESM1** - (A) Schematic view of the three types of experiments in this study: exposure to tridistilled water, air and to continuous dripping. (B) Experimental system for oxidation under drip exposure: (1) ISMATEC<sup>®</sup> pump; (2) Isoprene tubes; (3) Pyrites; (4) Tridistilled water tank.
